# Supplementary material for: Modulating the microporosity of cobalt phosphonates via positional isomerism of co-linkers
Source: Royal Society of Chemistry journal article supplement (doi:10.1039/c5ce01087j), 2015-01-01
Supplement: c5ce01087j1.pdf [file c5ce01087j1.pdf]

## Supporting Information

### **Modulating the microporosity of cobalt phosphonates *via* positional isomerism of co-linkers**

Tao Zheng, Zhong-Sheng Cai, Wei-Xuan Nie, Min Ren, Song-Song Bao\* and Li-Min Zheng\*

**Table S1** Selected bond lengths (Å) and angles (deg) of compound **1**

|         |          |             |          |             |          |
|---------|----------|-------------|----------|-------------|----------|
| Co1-O7A | 2.047(2) | O7A-Co1-O2  | 87.0(1)  | O2-Co2-O1W  | 162.0(1) |
| Co1-O2  | 2.066(2) | O7A-Co1-O2C | 93.0(1)  | N4D-Co2-O1W | 90.0(1)  |
| Co1-O4  | 2.116(2) | O7A-Co1-O4C | 89.8(1)  | O2W-Co2-O1W | 85.5(1)  |
| Co2-O6B | 2.058(2) | O2-Co1-O4C  | 81.3(1)  | O6B-Co2-O4C | 96.3(1)  |
| Co2-O2  | 2.080(2) | O7A-Co1-O4  | 90.2(1)  | O2-Co2-O4C  | 77.4(1)  |
| Co2-N4D | 2.092(2) | O2-Co1-O4   | 98.7(1)  | N4D-Co2-O4C | 174.7(1) |
| Co2-O2W | 2.107(2) | O6B-Co2-O2  | 91.8(1)  | O2W-Co2-O4C | 89.2(1)  |
| Co2-O1W | 2.124(2) | O6B-Co2-N4D | 86.2(1)  | O1W-Co2-O4C | 85.1(1)  |
| Co2-O4C | 2.273(2) | O2-Co2-N4D  | 107.3(1) | O1D-Co3-O8A | 107.9(1) |
| Co3-O1D | 1.932(2) | O6B-Co2-O2W | 174.5(1) | O1D-Co3-O3  | 108.1(1) |
| Co3-O8A | 1.951(2) | O2-Co2-O2W  | 90.0(1)  | O8A-Co3-O3  | 112.5(1) |
| Co3-O3  | 1.956(2) | N4D-Co2-O2W | 88.3(1)  | O1D-Co3-N1  | 108.5(1) |
| Co3-N1  | 2.002(2) | O6B-Co2-O1W | 94.4 (1) | O8A-Co3-N1  | 113.8(1) |
|         |          |             |          | O3-Co3-N1   | 105.9(1) |

Symmetric codes for **1**: A: x-1,y,z; B: -x+2,-y+2,-z+2; C: -x+1,-y+2,-z+2 ; D: -x+1,-y+1,-z+2; E: x+1,y,z.

**Table S2** Selected bond lengths (Å) and angles (deg) of compound **1a**

|         |          |             |          |             |          |
|---------|----------|-------------|----------|-------------|----------|
| Co1-O7A | 2.033(4) | O7A-Co1-O2  | 92.7(1)  | O2-Co2-O2W  | 82.6(1)  |
| Co1-O2  | 2.043(3) | O7B-Co1-O2  | 87.3(1)  | O1W-Co2-O2W | 87.3(2)  |
| Co1-O4  | 2.121(3) | O7A-Co1-O4  | 90.7(1)  | N4D-Co2-O2W | 84.9(2)  |
| Co2-O6A | 2.052(4) | O2-Co1-O4   | 100.3(1) | O6A-Co2-O4C | 94.8(1)  |
| Co2-O2  | 2.075(3) | O7A-Co1-O4C | 89.3(1)  | O2-Co2-O4C  | 75.3(1)  |
| Co2-O1W | 2.091(4) | O2-Co1-O4C  | 79.7(1)  | O1W-Co2-O4C | 82.7(1)  |
| Co2-N4D | 2.142(5) | O6A-Co2-O2  | 93.2(1)  | N4D-Co2-O4C | 173.2(1) |
| Co2-O2W | 2.192(4) | O6A-Co2-O1W | 100.9(2) | O2W-Co2-O4C | 95.3(1)  |
| Co2-O4C | 2.286(4) | O2-Co2-O1W  | 154.7(1) | O3-Co3-O1D  | 109.9(1) |
| Co3-O3  | 1.926(4) | O6A-Co2-N4D | 85.9(2)  | O3-Co3-O8B  | 111.1(1) |
| Co3-O1D | 1.937(3) | O2-Co2-N4D  | 111.5(1) | O1D-Co3-O8B | 108.6(1) |
| Co3-O8B | 1.949(3) | O1W-Co2-N4D | 90.5(2)  | O3-Co3-N1   | 117.7(1) |
| Co3-N1  | 2.023(5) | O6A-Co2-O2W | 167.7(2) | O1D-Co3-N1  | 99.4(1)  |
|         |          |             |          | O8B-Co3-N1  | 109.2(2) |

Symmetric codes for **1a**: A: -x-1,-y+1,-z+1; B: x+1,y,z; C: -x,-y+1,-z+1; D: -x,-y,-z+1; E: x-1,y,z.

**Table S3** Selected bond lengths (Å) and angles (deg) of compound **2**

|          |          |              |          |              |          |
|----------|----------|--------------|----------|--------------|----------|
| Co1-O7A  | 2.055(6) | O16B-Co1-O12 | 87.5(3)  | O2-Co3-O11   | 109.2(2) |
| Co1-O16B | 2.053(6) | O7A-Co1-O3   | 86.9(3)  | O2-Co3-O17F  | 107.7(2) |
| Co1-O12C | 2.054(7) | O16B-Co1-O3  | 92.7(3)  | O11-Co3-O17F | 110.7(2) |
| Co1-O3   | 2.057(6) | O12C-Co1-O3  | 179.6(3) | O2-Co3-N5    | 103.1(2) |
| Co1-O13C | 2.115(6) | O7A-Co1-O13C | 89.5(3)  | O11-Co3-N5   | 114.5(3) |
| Co1-O4   | 2.111(6) | O16B-Co1-O13 | 89.0(2)  | O17F-Co3-N5  | 111.1(3) |

|             |          |              |          |               |          |
|-------------|----------|--------------|----------|---------------|----------|
| Co2-O6D     | 2.070(6) | O12C-Co1-O13 | 99.7(3)  | O15G-Co4-O4W  | 93.7(3)  |
| Co2-O12     | 2.086(6) | O3-Co1-O13C  | 80.6(3)  | O15G-Co4-O3H  | 91.3(2)  |
| Co2-O2W     | 2.097(7) | O7A-Co1-O4   | 91.0(2)  | O4W-Co4-O3H   | 159.4(3) |
| Co2-N4      | 2.115(8) | O16B-Co1-O4  | 90.5(2)  | O15G-Co4-O3W  | 171.9(3) |
| Co2-O1W     | 2.112(6) | O12C-Co1-O4  | 79.9(3)  | O4W-Co4-O3W   | 91.2(3)  |
| Co2-O4E     | 2.279(7) | O3-Co1-O4    | 99.8(3)  | O3H-Co4-O3W   | 86.4(2)  |
| Co3-O2      | 1.941(7) | O13C-Co1-O4  | 179.4(3) | O15G-Co4-N1   | 87.3(3)  |
| Co3-O11     | 1.948(6) | O6D-Co2-O12  | 92.2(2)  | O4W-Co4-N1    | 91.8(3)  |
| Co3-O17F    | 1.962(6) | O6D-Co2-O2W  | 174.6(3) | O3H-Co4-N1    | 108.5(3) |
| Co3-N5      | 2.000(9) | O12-Co2-O2W  | 88.3(2)  | O3W-Co4-N1    | 86.1(3)  |
| Co4-O15G    | 2.063(6) | O6D-Co2-N4   | 86.4(3)  | O15G-Co4-O13I | 97.6(2)  |
| Co4-O4W     | 2.088(7) | O12-Co2-N4   | 109.1(3) | O4W-Co4-O13I  | 82.9(3)  |
| Co4-O3H     | 2.091(6) | O2W-Co2-N4   | 88.3(3)  | O3H-Co4-O13I  | 76.6(2)  |
| Co4-O3W     | 2.101(7) | O6D-Co2-O1W  | 96.6(3)  | O3W-Co4-O13I  | 89.5(3)  |
| Co4-N1      | 2.114(9) | O12-Co2-O1W  | 158.6(2) | N1-Co4-O13I   | 173.0(3) |
| Co4-O13I    | 2.257(6) | O2W-Co2-O1W  | 84.9(2)  | O10J-Co5-O8K  | 109.7(3) |
| Co5-O10J    | 1.919(7) | N4-Co2-O1W   | 91.0(3)  | O10J-Co5-O1J  | 109.8(2) |
| Co5-O8K     | 1.944(6) | O6D-Co2-O4E  | 95.2(2)  | O8K-Co5-O1J   | 110.9(3) |
| Co5-O1J     | 1.963(6) | O12-Co2-O4E  | 75.5(2)  | O10J-Co5-N8   | 102.5(3) |
| Co5-N8      | 1.989(7) | O2W-Co2-O4E  | 90.2(3)  | O8K-Co5-N8    | 115.8(3) |
| O7A-Co1-O16 | 178.5(2) | N4-Co2-O4E   | 175.2(2) | O1J-Co5-N8    | 107.8(3) |
| O7A-Co1-O12 | 92.9(3)  | O1W-Co2-O4E  | 84.3(2)  |               |          |

Symmetric codes for **2**: A: x, y-1, z; B: x+1, y+1, z; C: x+1, y, z; D: x-1, y-1, z; E: x-1, y, z; F: x, y+1, z; G: x, -y-1, z-1/2; H: x-1, -y, z-1/2; I: x, -y, z-1/2; J: x, -y, z+1/2; K: x, -y+1, z+1/2.

**Table S4** Selected bond lengths (Å) and angles (deg) of compound **3**

|         |          |             |          |             |          |
|---------|----------|-------------|----------|-------------|----------|
| Co1-O2  | 2.048(3) | O2-Co1-O7B  | 93.0(1)  | O2-Co2-N4D  | 104.2(1) |
| Co1-O7B | 2.052(3) | O2-Co1-O4A  | 80.3(1)  | O2W-Co2-N4D | 94.0(1)  |
| Co1-O4  | 2.118(3) | O7C-Co1-O4A | 89.4(1)  | O6B-Co2-O4A | 97.7(1)  |
| Co2-O6B | 2.044(3) | O2-Co1-O4   | 99.7(1)  | O1W-Co2-O4A | 89.0(1)  |
| Co2-O1W | 2.078(3) | O7C-Co1-O4  | 90.6(1)  | O2-Co2-O4A  | 77.0(1)  |
| Co2-O2  | 2.081(3) | O6B-Co2-O1W | 173.3(1) | O2W-Co2-O4A | 84.8(1)  |
| Co2-O2W | 2.103(3) | O6B-Co2-O2  | 91.0(1)  | N4D-Co2-O4A | 176.2(1) |
| Co2-N4D | 2.115(4) | O1W-Co2-O2  | 89.3(1)  | O1E-Co3-O3  | 103.7(1) |
| Co2-O4A | 2.237(3) | O6B-Co2-O2W | 92.4(1)  | O1E-Co3-O8C | 109.9(1) |
| Co3-O1E | 1.923(3) | O1W-Co2-O2W | 89.3(1)  | O3-Co3-O8C  | 114.9(1) |
| Co3-O3  | 1.945(3) | O2-Co2-O2W  | 161.7(1) | O1E-Co3-N1  | 105.1(1) |
| Co3-O8C | 1.950(3) | O6B-Co2-N4D | 86.0(1)  | O3-Co3-N1   | 111.8(1) |
| Co3-N1  | 1.992(4) | O1W-Co2-N4D | 87.4(1)  | O8C-Co3-N1  | 110.9(1) |

Symmetric codes for **3**: A: -x+2, -y+2, -z; B: -x+3, -y+2, -z; C: x-1, y, z; D: x+1, y, z-1; E: -x+2, -y+1, -z.

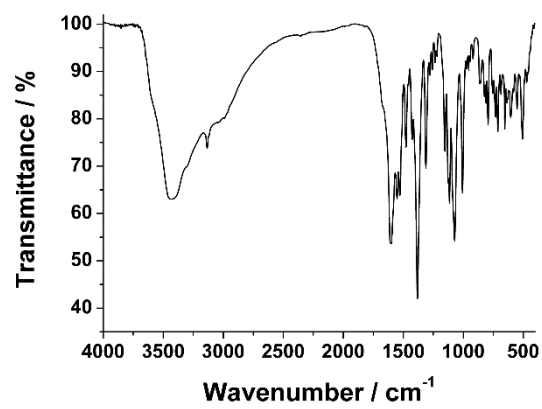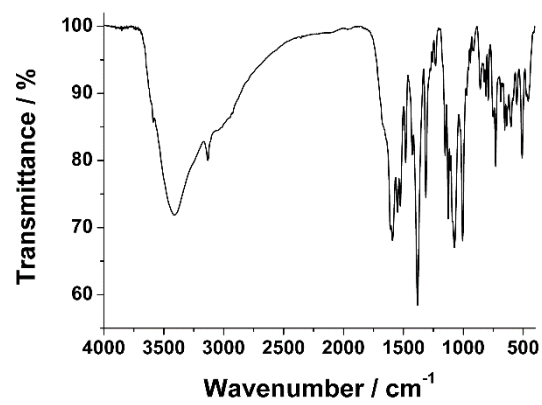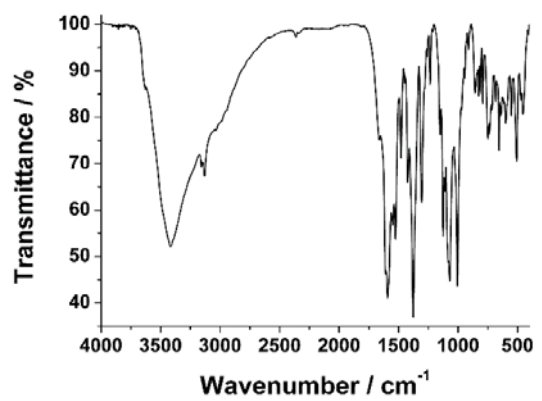

**Figure S1** IR spectra of **1** (top), **2** (middle), **3** (bottom).

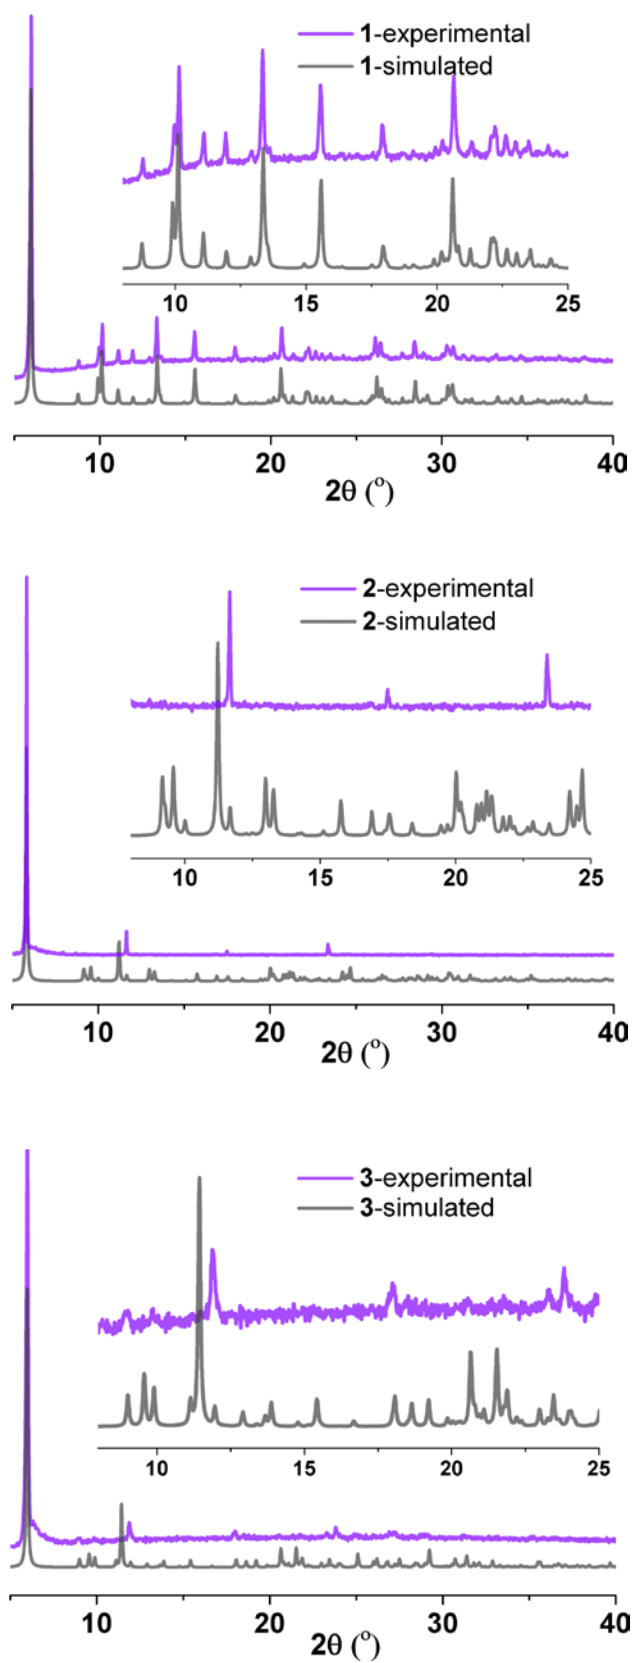

**Figure S2** XRD patterns of **1** (top), **2** (middle), **3** (bottom)

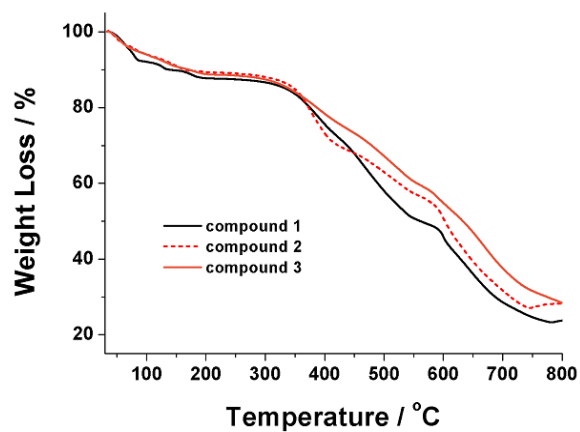

**Figure S3** TGA curves of compounds 1-3.

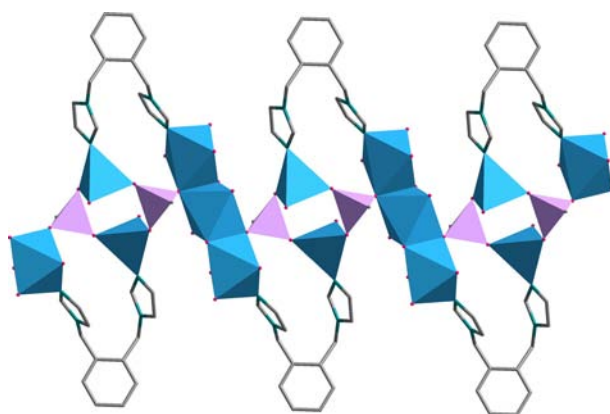

**Figure S4** Bridging mode of 1,2-bis in compound 1.

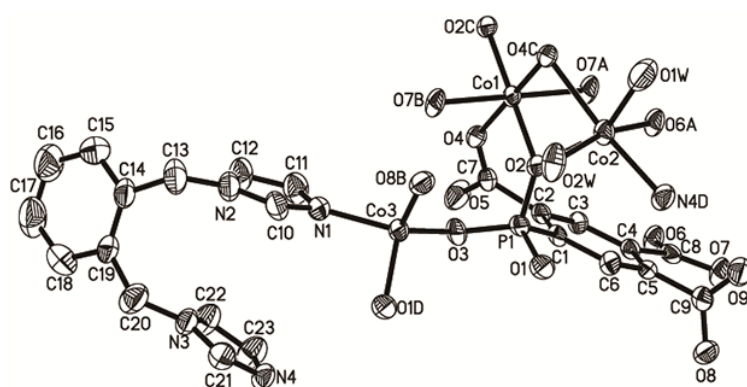

**Figure S5** Building unit of compound 1a. All hydrogen atoms and lattice water molecules are omitted for clarity.

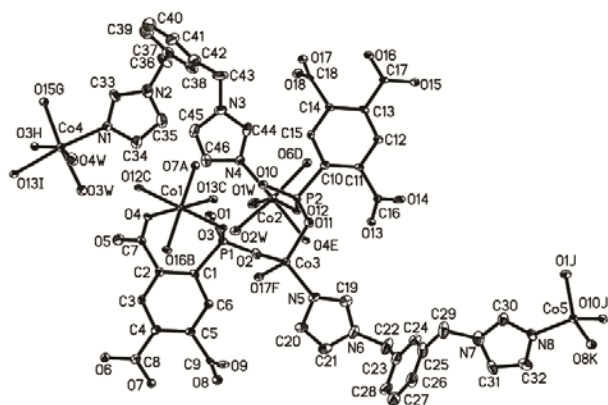

**Figure S6** Building unit of compound **2**. All hydrogen atoms and lattice water molecules are omitted for clarity.

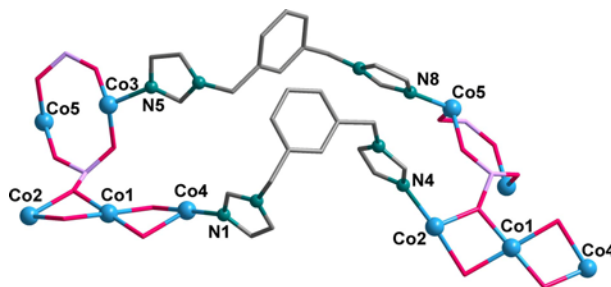

**Figure S7** Bridging modes of 1,3-bix in compound **2**.

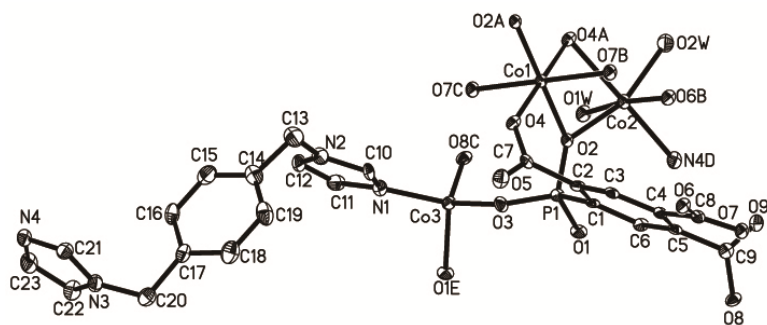

**Figure S8** Building unit of compound **3**. All hydrogen atoms and lattice water molecules are omitted for clarity.
